# Supplementary material for: Identification and Characterization of Novel Candidate Effector Proteins from Magnaporthe oryzae
Source: MDPI journal article supplement (doi:10.3390/jof9050574), 2023-05-15
Supplement: s1 [file s1]

**Table S2** Primers used in this study

| No. | Primers | Sequence:5'-3'                             | Comments                       |
|-----|---------|--------------------------------------------|--------------------------------|
| 1   | 04331-F | ccaattcagtcgactggatccATGTTTCGCCAAGCTCGCCAT | F primer to amplify P131_04331 |
| 2   | 04331-R | ctcgagtcgcgccgcgaattcTTATCCCTGGACAAAGTCA   | R primer to amplify P131_04331 |
| 3   | 08798-F | ccaattcagtcgactggatccATGCAGTACTCCCTGCTCTC  | F primer to amplify P131_08798 |
| 4   | 08798-R | ctcgagtcgcgccgcgaattcTTAGTTGCACGACGCGCTGG  | R primer to amplify P131_08798 |
| 5   | 00405-F | ccaattcagtcgactggatccATGTCTCTCAAGAGCTTGAT  | F primer to amplify P131_00405 |
| 6   | 00405-R | ctcgagtcgcgccgcgaattcTTAAGCGATCTCGCCGTCGC  | R primer to amplify P131_00405 |
| 7   | 10209-F | ccaattcagtcgactggatccATGCGTGTCTCTCCCTCGG   | F primer to amplify P131_10209 |
| 8   | 10209-R | ctcgagtcgcgccgcgaattcTTAGATTCCAACGTAGTGAG  | R primer to amplify P131_10209 |
| 9   | 02081-F | ccaattcagtcgactggatccATGCAGTTCACCGCCACCAT  | F primer to amplify P131_02081 |
| 10  | 02081-R | ctcgagtcgcgccgcgaattcCTAGCAGCCATAGGTGAGGA  | R primer to amplify P131_02081 |
| 11  | 09535-F | ccaattcagtcgactggatccATGCAGTTCAAGGCCGTCT   | F primer to amplify P131_09535 |
| 12  | 09535-R | ctcgagtcgcgccgcgaattcTTACGCGGCATTGCCCCAGG  | R primer to amplify P131_09535 |
| 13  | 06853-F | ccaattcagtcgactggatccATGAAGTACACCAGCGCCAT  | F primer to amplify P131_06853 |
| 14  | 06853-R | ctcgagtcgcgccgcgaattcCTACTCGTCATCCTCCTCGT  | R primer to amplify P131_06853 |
| 15  | 03335-F | ccaattcagtcgactggatccATGCAGTTCCTTTTCGCCAC  | F primer to amplify P131_03335 |
| 16  | 03335-R | ctcgagtcgcgccgcgaattcTTAGTTGACTCTGGAGTCCG  | R primer to amplify P131_03335 |
| 17  | 09450-F | ccaattcagtcgactggatccATGAGAGTCAGCACCGCCTT  | F primer to amplify P131_09450 |
| 18  | 09450-R | ctcgagtcgcgccgcgaattcTCAATCCACGCACATGATCT  | R primer to amplify P131_09450 |
| 19  | 09587-F | ccaattcagtcgactggatccATGGTTCGCGTTTCCACTTT  | F primer to amplify P131_09587 |
| 20  | 09587-R | ctcgagtcgcgccgcgaattcTTAGAAACCTTGCTTCTTG   | R primer to amplify P131_09587 |
| 21  | 06247-F | ccaattcagtcgactggatccATGAAGACTTCAATTGCCGC  | F primer to amplify P131_06247 |
| 22  | 06247-R | ctcgagtcgcgccgcgaattcTCATGAACAAGGATTGTTA   | R primer to amplify P131_06247 |
| 23  | 02098-F | ccaattcagtcgactggatccATGCAGTTCCTCAGCGTCGC  | F primer to amplify P131_02098 |
| 24  | 02098-R | ctcgagtcgcgccgcgaattcTTACTCCTCATCCTCATCC   | R primer to amplify P131_02098 |
| 25  | 11979-F | ccaattcagtcgactggatccATGCAGTTCCTCAACCATCAT | F primer to amplify P131_11979 |
| 26  | 11979-R | ctcgagtcgcgccgcgaattcCTATTGGCGCTGAGCCTGA   | R primer to amplify P131_11979 |
| 27  | 06308-F | ccaattcagtcgactggatccATGCACGTCAAGACCACCTG  | F primer to amplify P131_06308 |
| 28  | 06308-R | ctcgagtcgcgccgcgaattcTTACTCCTTCCCTCGTTGC   | R primer to amplify P131_06308 |
| 29  | 05316-F | ccaattcagtcgactggatccATGAAGACTTCCACCATT    | F primer to amplify P131_05316 |
| 30  | 05316-R | ctcgagtcgcgccgcgaattcTTATGTGTGGCCGTAGGCT   | R primer to amplify P131_05316 |
| 31  | 07132-F | ccaattcagtcgactggatccATGCTTGCCAACAACATCCT  | F primer to amplify P131_07132 |
| 32  | 07132-R | ctcgagtcgcgccgcgaattcTTATGGTTTCGCACTGCAC   | R primer to amplify P131_07132 |
| 33  | 08408-F | ccaattcagtcgactggatccATGCAGTTCAGCAGCGTCTT  | F primer to amplify P131_08408 |
| 34  | 08408-R | ctcgagtcgcgccgcgaattcTTAAGCGTCGGCCAGGTTGC  | R primer to amplify P131_08408 |
| 35  | 07667-F | ccaattcagtcgactggatccATGAATTTCCTCATCCTCC   | F primer to amplify P131_07667 |
| 36  | 07667-R | ctcgagtcgcgccgcgaattcTCAGTAGCTGACCTTGCC    | R primer to amplify P131_07667 |
| 37  | 08608-F | ccaattcagtcgactggatccATGAAGGCTTACGGTATCT   | F primer to amplify P131_08608 |
| 38  | 08608-R | ctcgagtcgcgccgcgaattcTTAAAAGCAGGAGGCATTG   | R primer to amplify P131_08608 |
| 39  | 08852-F | ccaattcagtcgactggatccATGTACGCCTTCAACTTCT   | F primer to amplify P131_08852 |
| 40  | 08852-R | ctcgagtcgcgccgcgaattcTTAGGCCTTTGGAGGGCAGT  | R primer to amplify P131_08852 |
| 41  | 04799-F | ccaattcagtcgactggatccATGCAACTCATCAACATCCT  | F primer to amplify P131_04799 |
| 42  | 04799-R | ctcgagtcgcgccgcgaattcTCAATGCAACAATGCTTGAT  | R primer to amplify P131_04799 |
| 43  | 10540-F | ccaattcagtcgactggatccATGCAGCTTCAGTCAATCA   | F primer to amplify P131_10540 |
| 44  | 10540-R | ctcgagtcgcgccgcgaattcTCAAAATTTAGGATCGTGCC  | R primer to amplify P131_10540 |
| 45  | 02490-F | ccaattcagtcgactggatccATGAAGTTCCTCATCGCCTC  | F primer to amplify P131_02490 |
| 46  | 02490-R | ctcgagtcgcgccgcgaattcTTAGTCTTGCTCGGCGGCGA  | R primer to amplify P131_02490 |
| 47  | 10190-F | ccaattcagtcgactggatccATGCAGTTTCTCAGCACCA   | F primer to amplify P131_10190 |

|    |         |                                            |                                |
|----|---------|--------------------------------------------|--------------------------------|
| 48 | 10190-R | ctcgagtgcggccgcgaattcTTACCAGTCCCAGCACTGG   | R primer to amplify P131_10190 |
| 49 | 03396-F | ccaattcagtcgactggatccATGAAGTTCTCCACCACTGC  | F primer to amplify P131_03396 |
| 50 | 03396-R | ctcgagtgcggccgcgaattcTCATCTTATAGATCTTTGTC  | R primer to amplify P131_03396 |
| 51 | 04934-F | ccaattcagtcgactggatccATGAGAAATATCTTCAGCG   | F primer to amplify P131_04934 |
| 52 | 04934-R | ctcgagtgcggccgcgaattcTTATTTGAGGTTCTCGGCAG  | R primer to amplify P131_04934 |
| 53 | 10366-F | ccaattcagtcgactggatccATGACGGCTCTGCTCATCT   | F primer to amplify P131_10366 |
| 54 | 10366-R | ctcgagtgcggccgcgaattcTCAAGGGTGAACACCGCCA   | R primer to amplify P131_10366 |
| 55 | 00603-F | ccaattcagtcgactggatccATGAAGTTACCGCTCCCC    | F primer to amplify P131_00603 |
| 56 | 00603-R | ctcgagtgcggccgcgaattcTTAACACGCCTTGTCGTCTTC | R primer to amplify P131_00603 |
| 57 | 12512-F | ccaattcagtcgactggatccATGATGCAAGTTCTCAAGT   | F primer to amplify P131_12512 |
| 58 | 12512-R | ctcgagtgcggccgcgaattcCTAATTCTTTTCATGCCTA   | R primer to amplify P131_12512 |
| 59 | 05618-F | ccaattcagtcgactggatccATGCAATTCTCAGTCCTTC   | F primer to amplify P131_05618 |
| 60 | 05618-R | ctcgagtgcggccgcgaattcCTAGGTGCCTTTTTCAACAG  | R primer to amplify P131_05618 |
| 61 | 09418-F | ccaattcagtcgactggatccATGGTTTCGCTCAGGTTCA   | F primer to amplify P131_09418 |
| 62 | 09418-R | ctcgagtgcggccgcgaattcTTATGGCTTGGACTCGCAC   | R primer to amplify P131_09418 |
| 63 | 04965-F | ccaattcagtcgactggatccATGTTCTCCAAAACATTGC   | F primer to amplify P131_04965 |
| 64 | 04965-R | ctcgagtgcggccgcgaattcTACTCGGCGTAGAACCAGT   | R primer to amplify P131_04965 |
| 65 | 03746-F | ccaattcagtcgactggatccATGACAGTCCTCAAGCTTG   | F primer to amplify P131_03746 |
| 66 | 03746-R | ctcgagtgcggccgcgaattcTCACAACAGCATGCCACCC   | R primer to amplify P131_03746 |
| 67 | 08988-F | ccaattcagtcgactggatccATGGTTCGCCTGTCCACCC   | F primer to amplify P131_08988 |
| 68 | 08988-R | ctcgagtgcggccgcgaattcTCAGGCAGTGCAGGAAAAG   | R primer to amplify P131_08988 |
| 69 | 01991-F | ccaattcagtcgactggatccATGTTGAGCAATTCGCAA    | F primer to amplify P131_01991 |
| 70 | 01991-R | ctcgagtgcggccgcgaattcTCACAGAGCAAAGGCACCC   | R primer to amplify P131_01991 |
| 71 | 05726-F | ccaattcagtcgactggatccATGTTTGAAAATTATCTAG   | F primer to amplify P131_05726 |
| 72 | 05726-R | ctcgagtgcggccgcgaattcTCAACTCGGCTGTGACGGAT  | R primer to amplify P131_05726 |
| 73 | 04657-F | ccaattcagtcgactggatccATGAAGTCCCTCTTCCTCAC  | F primer to amplify P131_04657 |
| 74 | 04657-R | ctcgagtgcggccgcgaattcTTAAATGTATTGCCAAGCCG  | R primer to amplify P131_04657 |
| 75 | 10498-F | ccaattcagtcgactggatccATGCAGCTCGTCACCCTT    | F primer to amplify P131_10498 |
| 76 | 10498-R | ctcgagtgcggccgcgaattcTCAAGCATCGCTGAGGAGGA  | R primer to amplify P131_10498 |
| 77 | 05053-F | ccaattcagtcgactggatccATGATCGGTGTCAAGGCAG   | F primer to amplify P131_05053 |
| 78 | 05053-R | ctcgagtgcggccgcgaattcCTAGTCCAGGTTGCCAGGC   | R primer to amplify P131_05053 |
| 79 | 11027-F | ccaattcagtcgactggatccATGGCTTCGAAATATTTA    | F primer to amplify P131_11027 |
| 80 | 11027-R | ctcgagtgcggccgcgaattcTTAGTCGTCATTTCTACCAG  | R primer to amplify P131_11027 |
| 81 | 11327-F | ccaattcagtcgactggatccATGGCGCTGTTTCGACAGGAG | F primer to amplify P131_11327 |
| 82 | 11327-R | ctcgagtgcggccgcgaattcTCACAAGTCGCAGAAGAAG   | R primer to amplify P131_11327 |
| 83 | 06526-F | ccaattcagtcgactggatccATGAAGTTGCTCAACATCG   | F primer to amplify P131_06526 |
| 84 | 06526-R | ctcgagtgcggccgcgaattcTTACAACAGGACAAGACCG   | R primer to amplify P131_06526 |
| 85 | 04616-F | ccaattcagtcgactggatccATGTCGCAGGTCTTGACGC   | F primer to amplify P131_04616 |
| 86 | 04616-R | ctcgagtgcggccgcgaattcTCACCGCATTAATAGTAATA  | R primer to amplify P131_04616 |
| 87 | 05913-F | ccaattcagtcgactggatccATGGCTGCAACAAGGCGTTC  | F primer to amplify P131_05913 |
| 88 | 05913-R | ctcgagtgcggccgcgaattcTCAGACCGCCCTCGGCTTTG  | R primer to amplify P131_05913 |
| 89 | 10596-F | ccaattcagtcgactggatccATGGGCAAAGACACCAAGG   | F primer to amplify P131_10596 |
| 90 | 10596-R | ctcgagtgcggccgcgaattcTACTCGTCTGCATCAGGG    | R primer to amplify P131_10596 |
| 91 | 01240-F | ccaattcagtcgactggatccATGAAGTTCTTGGCTCTCC   | F primer to amplify P131_01240 |
| 92 | 01240-R | ctcgagtgcggccgcgaattcTCAAATGTAGTTGCCCTT    | R primer to amplify P131_01240 |
| 93 | 10222-F | ccaattcagtcgactggatccATGTTCCGCAAGGTTACCA   | F primer to amplify P131_10222 |
| 94 | 10222-R | ctcgagtgcggccgcgaattcTACTCCTCGTCGTCTCTCA   | R primer to amplify P131_10222 |
| 95 | 02819-F | ccaattcagtcgactggatccATGCACTTCTCCACCACCG   | F primer to amplify P131_02819 |
| 96 | 02819-R | ctcgagtgcggccgcgaattcCTAAGGAGCGCACAGCGTCA  | R primer to amplify P131_02819 |

|     |         |                                            |                                |
|-----|---------|--------------------------------------------|--------------------------------|
| 97  | 08949-F | ccaattcagtcgactggatccATGGCACCCCTCACGCACC   | F primer to amplify P131_08949 |
| 98  | 08949-R | ctcgagtgcggccgcgaattcTCAGCACCTCCTCCACTTG   | R primer to amplify P131_08949 |
| 99  | 01166-F | ccaattcagtcgactggatccATGCGATTCTCCAGCCTCAC  | F primer to amplify P131_01166 |
| 100 | 01166-R | ctcgagtgcggccgcgaattcTCAGGTGTGTGGCCATGGG   | R primer to amplify P131_01166 |
| 101 | 01375-F | ccaattcagtcgactggatccATGCAATCCCATCCGCTC    | F primer to amplify P131_01375 |
| 102 | 01375-R | ctcgagtgcggccgcgaattcCTACATACAATCAGAAGCG   | R primer to amplify P131_01375 |
| 103 | 01161-F | ccaattcagtcgactggatccATGCGCTTCAACTCGATCAC  | F primer to amplify P131_01161 |
| 104 | 01161-R | ctcgagtgcggccgcgaattcTTACAGAAGAGCAGCAAGAC  | R primer to amplify P131_01161 |
| 105 | 04833-F | ccaattcagtcgactggatccATGCATTCCACCACAAGTC   | F primer to amplify P131_04833 |
| 106 | 04833-R | ctcgagtgcggccgcgaattcTTACAAAGCAGCCACAGCCC  | R primer to amplify P131_04833 |
| 107 | 10254-F | ccaattcagtcgactggatccATGTACCTCATCAACCTGA   | F primer to amplify P131_10254 |
| 108 | 10254-R | ctcgagtgcggccgcgaattcCTACTTGCATGACAGGCTG   | R primer to amplify P131_10254 |
| 109 | 08851-F | ccaattcagtcgactggatccATGCCGTCCACGCTCACCC   | F primer to amplify P131_08851 |
| 110 | 08851-R | ctcgagtgcggccgcgaattcTCATGCAATCGCAGTCATC   | R primer to amplify P131_08851 |
| 111 | 02351-F | ccaattcagtcgactggatccATGAAGCTACAACAGACCGC  | F primer to amplify P131_02351 |
| 112 | 02351-R | ctcgagtgcggccgcgaattcCTAAAGCAAGGCCGCGAG    | R primer to amplify P131_02351 |
| 113 | 01889-F | ccaattcagtcgactggatccATGAAGTACTCAAAAGTCTC  | F primer to amplify P131_01889 |
| 114 | 01889-R | ctcgagtgcggccgcgaattcCTATTGGGCACTCTGTCTCTC | R primer to amplify P131_01889 |
| 115 | 08602-F | ccaattcagtcgactggatccATGCTCATCTCGCGCCTC    | F primer to amplify P131_08602 |
| 116 | 08602-R | ctcgagtgcggccgcgaattcTCAACCGGCAGAGCAGGTG   | R primer to amplify P131_08602 |
| 117 | 04259-F | ccaattcagtcgactggatccATGCGCACCTTTTCTCTC    | F primer to amplify P131_04259 |
| 118 | 04259-R | ctcgagtgcggccgcgaattcTCAGTTTCCGTCCGACTCG   | R primer to amplify P131_04259 |
| 119 | 08153-F | ccaattcagtcgactggatccATGAAGTGCATCGCCAGC    | F primer to amplify P131_08153 |
| 120 | 08153-R | ctcgagtgcggccgcgaattcTCAGCAGGTAAAGACGGGA   | R primer to amplify P131_08153 |
| 121 | 02766-F | ccaattcagtcgactggatccATGCTCCCCCTCGTGCATC   | F primer to amplify P131_02766 |
| 122 | 02766-R | ctcgagtgcggccgcgaattcTCACAACACCCTCGTGCAAG  | R primer to amplify P131_02766 |
| 123 | 02892-F | ccaattcagtcgactggatccATGTTACCCACCCTCCTG    | F primer to amplify P131_02892 |
| 124 | 02892-R | ctcgagtgcggccgcgaattcTCAATGCGGTGCGTCGTT    | R primer to amplify P131_02892 |
| 125 | 02630-F | ccaattcagtcgactggatccATGCAATTCAAATCCCTC    | F primer to amplify P131_02630 |
| 126 | 02630-R | ctcgagtgcggccgcgaattcTCAAATGCCTATGCAATCC   | R primer to amplify P131_02630 |
| 127 | 10151-F | ccaattcagtcgactggatccATGAGGGTCTCTCAGATCA   | F primer to amplify P131_10151 |
| 128 | 10151-R | ctcgagtgcggccgcgaattcTTAGAGGATCAGGACCGCGC  | R primer to amplify P131_10151 |
| 129 | 03327-F | ccaattcagtcgactggatccATGAAGTTTCAAATTCTC    | F primer to amplify P131_03327 |
| 130 | 03327-R | ctcgagtgcggccgcgaattcTCATTGTTTGCCCTTCAAG   | R primer to amplify P131_03327 |
| 131 | 09986-F | ccaattcagtcgactggatccATGGTCTCCTTCACCCCAC   | F primer to amplify P131_09986 |
| 132 | 09986-R | ctcgagtgcggccgcgaattcCTAGTTGCCGCTCTGGGGCT  | R primer to amplify P131_09986 |
| 133 | 05921-F | ccaattcagtcgactggatccATGAAGTTCACCTCCACC    | F primer to amplify P131_05921 |
| 134 | 05921-R | ctcgagtgcggccgcgaattcTTAGGCGCAGAGGGTAGCCT  | R primer to amplify P131_05921 |
| 135 | 07649-F | ccaattcagtcgactggatccATGAAGGCCACACTCGTCAC  | F primer to amplify P131_07649 |
| 136 | 07649-R | ctcgagtgcggccgcgaattcCTAGGCAAACCTCTTGCACG  | R primer to amplify P131_07649 |
| 137 | 05538-F | ccaattcagtcgactggatccATGAAGTACGGATCTATCC   | F primer to amplify P131_05538 |
| 138 | 05538-R | ctcgagtgcggccgcgaattcTCAGCACCATTCGCTGTGTG  | R primer to amplify P131_05538 |

  

|     |            |                         |                                                        |
|-----|------------|-------------------------|--------------------------------------------------------|
| 139 | NbACT-RT-F | ATGGCAGACGGTGAGGATATTC  | F primer for RT-PCR of <i>actin</i> gene of <i>N.b</i> |
| 140 | NbACT-RT-R | GCCTTTGCAATCCACATCTGTTG | R primer for RT-PCR of <i>actin</i> gene of <i>N.b</i> |
| 141 | NLP1-RT-F  | GACGTCATCAACCACGATGC    | F primer for RT-PCR of MoNLP1                          |
| 142 | NLP1-RT-R  | GATGACGTTCTCCAGTCGT     | R primer for RT-PCR of MoNLP1                          |
| 143 | CEP1-RT-F  | ATGAAGTTCACCGCTCCCT     | F primer for RT-PCR of MoCEP1                          |
| 144 | CEP1-RT-R  | ACACGCCTTGTCGTCTTCCA    | R primer for RT-PCR of MoCEP1                          |
| 145 | CEP2-RT-F  | ATGGCAACTTCCTATGCCCC    | F primer for RT-PCR of MoCEP2                          |

|     |            |                       |                                   |
|-----|------------|-----------------------|-----------------------------------|
| 146 | CEP2-RT-R  | TGACCTCGACGTTCCAGTTG  | R primer for RT-PCR of MoCEP2     |
| 147 | CEP3-RT-F  | ATGCAGTTCTTCAGCGTCGC  | F primer for RT-PCR of MoCEP3     |
| 148 | CEP3-RT-R  | CTCCTCATCCTCATCCTCCT  | R primer for RT-PCR of MoCEP3     |
| 149 | CEP4-RT-F  | TCGTCAGACAACTGCACCAA  | F primer for RT-PCR of MoCEP4     |
| 150 | CEP4-RT-R  | CTTGCGCCCTCCAAATTTCC  | R primer for RT-PCR of MoCEP4     |
| 151 | CEP5-RT-F  | ATGAAGGCTTACGGTATCTT  | F primer for RT-PCR of MoCEP5     |
| 152 | CEP5-RT-R  | AAAGCAGGAGGCATTGAGGT  | R primer for RT-PCR of MoCEP5     |
| 153 | CEP6-RT-F  | CTGTGCACCAACTCCAACCTG | F primer for RT-PCR of MoCEP6     |
| 154 | CEP6-RT-R  | TAGCTGGTGACCCTGTCGTT  | R primer for RT-PCR of MoCEP6     |
| 155 | CEP7-RT-F  | CGCTGACGGAATGCAACAC   | F primer for RT-PCR of MoCEP7     |
| 156 | CEP7-RT-R  | AGTGGTGACCCAGGAACCTG  | R primer for RT-PCR of MoCEP7     |
| 157 | CEP8-RT-F  | AGAATGGGCGTCATCTACCC  | F primer for RT-PCR of MoCEP8     |
| 158 | CEP8-RT-R  | CACTCGGTGTTTTGCCTGTC  | R primer for RT-PCR of MoCEP8     |
| 159 | GAS1-RT-F  | TCTCAAGAGCTTGATCGCCG  | F primer for RT-PCR of MoGAS1     |
| 160 | GAS1-RT-R  | CACCGTTGACCTGGTGAAGA  | R primer for RT-PCR of MoGAS1     |
| 161 | BAS2-RT-F  | ATGGTTTCGCGTTTCCACTT  | F primer for RT-PCR of BAS2       |
| 162 | BAS2-RT-R  | GAAACCCTGCTTCTTGACCT  | R primer for RT-PCR of BAS2       |
| 163 | 10540-RT-R | ATGCAGCTTCAGTCAATCA   | F primer for RT-PCR of P131_10540 |
| 164 | 10540-RT-R | TCAAAATTTAGGATCGTGGC  | R primer for RT-PCR of P131_10540 |

|     |             |                        |                             |
|-----|-------------|------------------------|-----------------------------|
| 165 | CEP1-qPCR-F | ACCGTCCCCCTCTTTCTAGG   | F primer for qPCR of MoCEP1 |
| 166 | CEP1-qPCR-R | AGTTTTTCCTTTTTTCGCGGGT | R primer for qPCR of MoCEP1 |
| 167 | CEP2-qPCR-F | ATGCCAACTACGACCCCAAG   | F primer for qPCR of MoCEP2 |
| 168 | CEP2-qPCR-R | CCCGAGTTGCACTGGTACAT   | R primer for qPCR of MoCEP2 |
| 169 | CEP3-qPCR-F | TCCCTAACGGAAGACGTGC    | F primer for qPCR of MoCEP3 |
| 170 | CEP3-qPCR-R | CATCCTCACGGGCTTGAAGT   | R primer for qPCR of MoCEP3 |
| 171 | CEP4-qPCR-F | TTCAAAGTGCCCCTCGAGAC   | F primer for qPCR of MoCEP4 |
| 172 | CEP4-qPCR-R | GCCTGTTGCATCCAGGAGTA   | R primer for qPCR of MoCEP4 |
| 173 | CEP5-qPCR-F | TGAAGCTCCTCCGCAGAAAG   | F primer for qPCR of MoCEP5 |
| 174 | CEP5-qPCR-R | GCTATCAGTTGCATCGCACG   | R primer for qPCR of MoCEP5 |
| 175 | CEP6-qPCR-F | TCTACCTGTGCACCAACTCC   | F primer for qPCR of MoCEP6 |
| 176 | CEP6-qPCR-R | TCCGGCGTTGAAGTAGAAGC   | R primer for qPCR of MoCEP6 |
| 177 | CEP7-qPCR-F | GGTCATGCTCAACGACAAC    | F primer for qPCR of MoCEP7 |
| 178 | CEP7-qPCR-R | GTGTAAGGCACACTGGCAAC   | R primer for qPCR of MoCEP7 |
| 179 | CEP8-qPCR-F | ACAGGTCTTGCGACAACCAA   | F primer for qPCR of MoCEP8 |
| 180 | CEP8-qPCR-R | GAAGTCTGCGTTGGAGCTGA   | R primer for qPCR of MoCEP8 |
| 181 | GAS1-qPCR-F | AGCTCAACGACGATGCTTCT   | F primer for qPCR of MoGAS1 |
| 182 | GAS1-qPCR-R | ACGAGAGGGAAGTCGGTCAT   | R primer for qPCR of MoGAS1 |
| 183 | BAS2-qPCR-F | ACCGATTGCCAGTCGAGATG   | F primer for qPCR of BAS2   |
| 184 | BAS2-qPCR-R | TAACGGTCTGGGCCTTGTTG   | R primer for qPCR of BAS2   |

|     |            |                                     |                                                       |
|-----|------------|-------------------------------------|-------------------------------------------------------|
| 185 | FLCEP1-S-F | ttaaattaagaattcATGAAGTTCACCGCTCCCCT | F primer of full length of MoCEP1 for yeast secretion |
| 186 | FLCEP1-S-R | agggagaacctcgagACACGCCTTGTCGTCTTCCA | R primer of full length of MoCEP1 for yeast secretion |
| 187 | FLCEP2-S-F | ttaaattaagaattcATGAAGTCCCTCTTCCTCAC | F primer of full length of MoCEP2 for yeast secretion |
| 188 | FLCEP2-S-R | agggagaacctcgagAATGTATTGCCAAGCCGAAG | R primer of full length of MoCEP2 for yeast secretion |
| 189 | FLCEP3-S-F | ttaaattaagaattcATGCAGTTCTTCAGCGTCGC | F primer of full length of MoCEP3 for yeast secretion |

|     |            |                                           |                                                                  |
|-----|------------|-------------------------------------------|------------------------------------------------------------------|
| 190 | FLCEP3-S-R | agggagaacctcgagCTCCTCATCCTCATCCTCCT       | R primer of full length of MoCEP3<br>for yeast secretion         |
| 191 | FLCEP5-S-F | ttaattaagaattcATGAAGGCTTACGGTATCTT        | F primer of full length of MoCEP5<br>for yeast secretion         |
| 192 | FLCEP5-S-R | agggagaacctcgagAAAGCAGGAGGCATTGAGGTC      | R primer of full length of MoCEP5<br>for yeast secretion         |
| 193 | FLCEP7-S-F | ttaattaagaattcATGTTCTCCAAAACATTGCT        | F primer of full length of MoCEP7<br>for yeast secretion         |
| 194 | FLCEP7-S-R | agggagaacctcgagCTCGGCGTAGAACCAGTAAA       | R primer of full length of MoCEP7<br>for yeast secretion         |
| 195 | NSCEP1-S-F | ttaattaagaattcATG GACCCCAACAGCCCTCACGA    | F primer of MoCEP1 with no signal<br>peptide for yeast secretion |
| 196 | NSCEP2-S-F | ttaattaagaattcATGGAAAAGTGCGGCGATGCCAAC    | F primer of MoCEP2 with no signal<br>peptide for yeast secretion |
| 197 | NSCEP3-S-F | ttaattaagaattcATGAAGGCGGTACGTGGAGCTAAT    | F primer of MoCEP3 with no signal<br>peptide for yeast secretion |
| 198 | NSCEP5-S-F | ttaattaagaattcATGCAAGGGGCCACAAACGAGGT     | F primer of MoCEP5 with no signal<br>peptide for yeast secretion |
| 199 | NSCEP7-S-F | ttaattaagaattcATGTCGCCTTGCAAGCCCAGGGC     | F primer of MoCEP7 with no signal<br>peptide for yeast secretion |
| 200 | SPCEP1-S-R | agggagaacctcgagAGGGCTGTTGGGGTCGCTCA       | R primer of signal peptide of MoCEP7<br>for yeast secretion      |
| 201 | SPCEP2-S-R | agggagaacctcgagTGCGAGAGCTGATGCACT         | R primer of signal peptide of MoCEP7<br>for yeast secretion      |
| 202 | SPCEP3-S-R | agggagaacctcgagGGCAGACACGGTGGCGGCCA       | R primer of signal peptide of MoCEP7<br>for yeast secretion      |
| 203 | SPCEP5-S-R | agggagaacctcgagAGCGGTTACGCCACAGCAA        | R primer of signal peptide of MoCEP7<br>for yeast secretion      |
| 204 | SPCEP7-S-R | agggagaacctcgagGGCGGAAACAGAAGCGACGA       | R primer of signal peptide of MoCEP7<br>for yeast secretion      |
| 205 | CEP1-GTN-F | caccaaaccgccaaggatccATGAAGTTCACCGCTCCCCT  | F primer of MoCEP1 for secretion                                 |
| 206 | CEP1-GTN-R | acctctagaactagtggatccACACGCCTTGTCGTCTTCCA | R primer of MoCEP1 for secretion                                 |
| 207 | CEP2-GTN-F | caccaaaccgccaaggatccATGAAGTCCCTCTTCCTCAC  | F primer of MoCEP2 for secretion                                 |
| 208 | CEP2-GTN-R | acctctagaactagtggatccAATGTATTGCCAAGCCGAAG | R primer of MoCEP2 for secretion                                 |
| 209 | CEP3-GTN-F | caccaaaccgccaaggatccATGCAGTTCCTCAGCGTCGC  | F primer of MoCEP3 for secretion                                 |
| 210 | CEP3-GTN-R | acctctagaactagtggatccCTCCTCATCCTCATCCTCCT | R primer of MoCEP3 or secretion                                  |
| 211 | CEP5-GTN-F | caccaaaccgccaaggatccATGAAGGCTTACGGTATCTT  | F primer of MoCEP5 for secretion                                 |
| 212 | CEP5-GTN-R | acctctagaactagtggatccAAAGCAGGAGGCATTGAGGT | R primer of MoCEP5 for secretion                                 |
| 213 | CEP7-GTN-F | caccaaaccgccaaggatccATGTTCTCCAAAACATTGCT  | F primer of MoCEP7 for secretion                                 |
| 214 | CEP7-GTN-R | acctctagaactagtggatccCTCGGCGTAGAACCAGTAAA | R primer of MoCEP7 for secretion                                 |

|     |              |                                               |                                             |
|-----|--------------|-----------------------------------------------|---------------------------------------------|
| 215 | CEP1-LB-F    | cgctctagaactagtggatccAGTGTCAGCATTGTGCGGTGCC   | F primer for making $\Delta$ -Mocep1 mutant |
| 216 | CEP1-LB-R    | tcagttatcgaattcctgcagGCGCTAGTTTTTCAGGCAGTCC   | R primer for making $\Delta$ -Mocep1 mutant |
| 217 | CEP1-RB-F    | cgggaaccagttatcaagcttGAATGGAATGTAGGGCGAACTC   | F primer for making $\Delta$ -Mocep1 mutant |
| 218 | CEP1-RB-R    | ggtaccggggccccccctcgagACAATCCGAATGCTGGGTGA    | R primer for making $\Delta$ -Mocep1 mutant |
| 219 | CEP2-LB-F    | cgctctagaactagtggatccCTCTGTAGGGCTGAGTTGAAGTTG | F primer for making $\Delta$ -Mocep2 mutant |
| 220 | CEP2-LB-R    | tcagttatcgaattcctgcagGGTTACTTTGGCGGTGTGATG    | R primer for making $\Delta$ -Mocep2 mutant |
| 221 | CEP2-RB-F    | ccagttatcaagcttatcatAGAGTTTGGCTGTAAGAGAAGGTGA | F primer for making $\Delta$ -Mocep2 mutant |
| 222 | CEP2-RB-R    | ggtaccggggccccccctcgagGTTGACCGAACCTTGAATCAACC | R primer for making $\Delta$ -Mocep2 mutant |
| 223 | CEP3-LB-F    | cgctctagaactagtggatccGCCATCAACACCATCTCTGGC    | F primer for making $\Delta$ -Mocep3 mutant |
| 224 | CEP3-LB-R    | tcaatatcagttatcgaattcGTAGACTGTTGTGGGTTGTGTTGG | R primer for making $\Delta$ -Mocep3 mutant |
| 225 | CEP3-RB-F    | cgggaaccagttatcaagcttTTATGCTTGGGTTTCGGCAA     | F primer for making $\Delta$ -Mocep3 mutant |
| 226 | CEP3-RB-R    | ggtaccggggccccccctcgagAGATGATGACCGAGGTGAGTCG  | R primer for making $\Delta$ -Mocep3 mutant |
| 227 | CEP5-LB-F    | cgctctagaactagtggatccCCTAATCACGAACTGCCATGTTT  | F primer for making $\Delta$ -Mocep5 mutant |
| 228 | CEP5-LB-R    | tcaatatcagttatcgaattcGATTGTGTTGTGTGGATTGGATG  | R primer for making $\Delta$ -Mocep5 mutant |
| 229 | CEP5-RB-F    | cgggaaccagttatcaagcttTTGCTGGAGAGGTGGATTCTG    | F primer for making $\Delta$ -Mocep5 mutant |
| 230 | CEP5-RB-R    | ggtaccggggccccccctcgagGCTTGCTGGGTTTGAATAAAC   | R primer for making $\Delta$ -Mocep5 mutant |
| 231 | CEP7-LB-F    | cgctctagaactagtggatccTACTGTCCGTCACCAAGCATTC   | F primer for making $\Delta$ -Mocep7 mutant |
| 232 | CEP7-LB-R    | tcaatatcagttatcgaattcTGACTTTGGGTGTGTGGATGG    | R primer for making $\Delta$ -Mocep7 mutant |
| 233 | CEP7-RB-F    | aagcttatcgataccgtcgacCGCCATCACTTTCTTCGTCTCT   | F primer for making $\Delta$ -Mocep7 mutant |
| 234 | CEP7-RB-R    | agggaacaaaagctgggtaccTTGAGTTCAGCAGCGAAACAAAT  | R primer for making $\Delta$ -Mocep7 mutant |
| 235 | CEP1-Probe-F | AGTGTCAGCATTGTGCGGTGCC                        | F primer for probe of MoCEP1                |
| 236 | CEP1-Probe-R | GCGCTAGTTTTTCAGGCAGTCC                        | F primer for probe of MoCEP1                |
| 237 | CEP2-Probe-F | CTCTGTAGGGCTGAGTTGAAGTTG                      | F primer for probe of MoCEP2                |
| 238 | CEP2-Probe-R | GGTTACTTTGGCGGTGTGATG                         | F primer for probe of MoCEP2                |
| 239 | CEP3-Probe-F | TTATGCTTGGGTTTCGGCAA                          | F primer for probe of MoCEP3                |
| 240 | CEP3-Probe-R | AGATGATGACCGAGGTGAGTCG                        | F primer for probe of MoCEP3                |
| 241 | CEP5-Probe-F | CCTAATCACGAACTGCCATGTTT                       | F primer for probe of MoCEP5                |
| 242 | CEP5-Probe-R | GATTGTGTTGTGTGGATTGGATG                       | F primer for probe of MoCEP5                |
| 243 | CEP7-Probe-F | CGCCATCACTTTCTTCGTCTCT                        | F primer for probe of MoCEP7                |
| 244 | CEP7-Probe-R | TTGAGTTCAGCAGCGAAACAAAT                       | F primer for probe of MoCEP7                |
