# Supplementary material for: Identification and Characterization of Novel Candidate Effector Proteins from Magnaporthe oryzae
Source: MDPI journal article supplement (doi:10.3390/jof9050574), 2023-05-15
Supplement: s1 [file s1]

**Table S1** List of 69 cloned putative effector genes from *M.oryzae* isolate P131.

| No. | Gene ID    | Amino Acids | Description                                        | Comments             |
|-----|------------|-------------|----------------------------------------------------|----------------------|
| 1   | P131_04331 | 183         | Chitin binding protein                             |                      |
| 2   | P131_08798 | 229         | Chitin binding protein                             |                      |
| 3   | P131_00405 | 251         | MAS3 protein                                       | GAS1                 |
| 4   | P131_10209 | 283         | Beta-glucanase                                     |                      |
| 5   | P131_02081 | 153         | Avr-Pi54 protein                                   |                      |
| 6   | P131_09535 | 153         | Extracellular serine-rich protein                  |                      |
| 7   | P131_06853 | 290         | MAS3 protein                                       |                      |
| 8   | P131_03335 | 117         | Hypothetical protein                               |                      |
| 9   | P131_09450 | 132         | Hypothetical protein                               |                      |
| 10  | P131_09587 | 102         | Biotrophy-associated secreted protein 2            | BAS2                 |
| 11  | P131_06247 | 86          | Hypothetical protein                               |                      |
| 12  | P131_02098 | 125         | Hypothetical protein                               | Identified as MoCEP3 |
| 13  | P131_11979 | 108         | AvrPiz-t protein                                   |                      |
| 14  | P131_06308 | 140         | Hypothetical protein                               |                      |
| 15  | P131_05316 | 286         | Hypothetical protein                               |                      |
| 16  | P131_07132 | 114         | Hypothetical protein                               |                      |
| 17  | P131_08408 | 118         | Hypothetical protein                               |                      |
| 18  | P131_07667 | 193         | Secretory phospholipase A2                         | Identified as MoCEP4 |
| 19  | P131_08852 | 141         | Hypothetical protein                               |                      |
| 20  | P131_04799 | 130         | Hypothetical protein                               |                      |
| 21  | P131_10540 | 111         | Hypothetical protein                               |                      |
| 22  | P131_02490 | 134         | Hypothetical protein                               |                      |
| 23  | P131_03396 | 220         | PCI domain-containing protein                      |                      |
| 24  | P131_08608 | 105         | Hypothetical protein                               | Identified as MoCEP5 |
| 25  | P131_04934 | 272         | Carbonate dehydratase                              |                      |
| 26  | P131_10366 | 187         | Carbohydrate-binding WSC domain-containing protein |                      |
| 27  | P131_00603 | 100         | Hypothetical protein                               | Identified as MoCEP1 |
| 28  | P131_12512 | 89          | Hypothetical protein                               |                      |
| 29  | P131_05618 | 160         | Hypothetical protein                               |                      |
| 30  | P131_09418 | 106         | Hypothetical protein                               |                      |
| 31  | P131_03746 | 245         | Hypothetical protein                               |                      |
| 32  | P131_08988 | 197         | Biotrophy-associated secreted protein 2            |                      |
| 33  | P131_01991 | 198         | PCI domain-containing protein                      |                      |
| 34  | P131_05726 | 270         | Thaumatococcus, pathogenesis-related protein       |                      |
| 35  | P131_04657 | 244         | Carbohydrate-binding module family 52 protein      | Identified as MoCEP2 |

**Table S1** List of 69 cloned effector genes from *M.oryzae* isolate P131.

| No. | Gene ID    | Amino Acids | Description                                                    | Comments             |
|-----|------------|-------------|----------------------------------------------------------------|----------------------|
| 36  | P131_10498 | 219         | GPI anchored cell wall protein                                 |                      |
| 37  | P131_05053 | 152         | Hypothetical protein                                           |                      |
| 38  | P131_11027 | 123         | Hypothetical protein                                           |                      |
| 39  | P131_06526 | 278         | Hypothetical protein                                           |                      |
| 40  | P131_10190 | 170         | Hypothetical protein                                           | Identified as MoCEP6 |
| 41  | P131_04616 | 216         | Extensin isoform X1                                            |                      |
| 42  | P131_05913 | 274         | Amidohydrolase 3                                               |                      |
| 43  | P131_10596 | 274         | (R)-specific carbonyl reductase                                |                      |
| 44  | P131_01240 | 177         | Secretory phospholipase a2                                     |                      |
| 45  | P131_10222 | 275         | CAS1 domain-containing protein 1                               |                      |
| 46  | P131_02819 | 161         | Bys1 family protein                                            |                      |
| 47  | P131_08949 | 199         | Hypothetical protein                                           |                      |
| 48  | P131_01166 | 276         | Cyclohexadienyl dehydratase                                    |                      |
| 49  | P131_01375 | 156         | Hypothetical protein                                           |                      |
| 50  | P131_04965 | 267         | Putative malate dehydrogenase protein                          | Identified as MoCEP7 |
| 51  | P131_01161 | 220         | Hypothetical protein                                           |                      |
| 52  | P131_04833 | 240         | Hypothetical protein                                           |                      |
| 53  | P131_10254 | 130         | Hypothetical protein                                           |                      |
| 54  | P131_08851 | 212         | Hypothetical protein                                           |                      |
| 55  | P131_02351 | 245         | GPI anchored protein                                           |                      |
| 56  | P131_01889 | 246         | Hypothetical protein                                           |                      |
| 57  | P131_08602 | 65          | Hypothetical protein                                           |                      |
| 58  | P131_04259 | 295         | Putative aspergillopepsin protein                              |                      |
| 59  | P131_08153 | 224         | Endoglucanase II                                               |                      |
| 60  | P131_02766 | 256         | Concanavalin a-like lectin/glucanase domain-containing protein |                      |
| 61  | P131_02892 | 218         | Hypothetical protein                                           |                      |
| 62  | P131_02630 | 87          | Hypothetical protein                                           |                      |
| 63  | P131_10151 | 181         | Hypothetical protein                                           |                      |
| 64  | P131_11327 | 134         | Putative neurofilament medium polypeptide protein              | Identified as MoCEP8 |
| 65  | P131_03327 | 184         | Hypothetical protein                                           |                      |
| 66  | P131_09986 | 130         | Hypothetical protein                                           |                      |
| 67  | P131_05921 | 152         | Putative bys1 domain protein                                   |                      |
| 68  | P131_07649 | 290         | Aspergillopepsin-2                                             |                      |
| 69  | P131_05538 | 83          | Hypothetical protein                                           |                      |
