# Supplementary material for: Identification and Characterization of Novel Candidate Effector Proteins from Magnaporthe oryzae
Source: J Fungi (Basel). 2023 May 15;9(5):574. doi: 10.3390/jof9050574 (PMC10219149; doi:10.3390/jof9050574)
Supplement: Supplementary file 1 [file jof-09-00574-s001.zip]

Archive with 7 entries (7 files):
- Figure S1.tif
- Figure S2.tif
- Figure S3.tif
- Figure S4.tif
- Supplemental materials legends .pdf
- Table S1.pdf
- Table S2.pdf
